# Supplementary material for: Synchronous screening of multiplexed biomarkers of Alzheimer's disease by a length-encoded aerolysin nanopore-integrated triple-helix molecular switch
Source: Royal Society of Chemistry journal article supplement (doi:10.1039/c9cc02065a), 2019-01-01
Supplement: c9cc02065a1.pdf [file c9cc02065a1.pdf]

Electronic Supplementary Information (ESI)

**Synchronous Screening Multiplexed Biomarkers of Alzheimer's  
Disease by Length-encoded Aerolysin Nanopore-Integrated Triple-  
helix Molecular Switch**

*Zhen Zou,<sup>a</sup> Hua Yang,<sup>a</sup> Qi Yan,<sup>a</sup> Peng Qi,<sup>a</sup> Zhihe Qing,<sup>a</sup> Jing Zheng,<sup>b</sup> Xuan Xu,<sup>c</sup>*

*Lihua Zhang,<sup>d</sup> Feng Feng,<sup>d</sup> and Ronghua Yang<sup>a,b\*</sup>*

<sup>a</sup>School of Chemistry and Food Engineering, Changsha University of Science and Technology, Changsha, 410114, P. R. China.

<sup>b</sup>State Key Laboratory of Chemo/Biosensing and Chemometrics, Hunan University, Changsha 410082, P. R. China

<sup>c</sup>Children's Medical Center, People's Hospital of Hunan Province, Changsha, Hunan 410002, P. R. China.

<sup>d</sup>College of Chemistry and Environmental Engineering, Shanxi Datong University, Datong, Shanxi ,037009, PR China

\*To whom correspondence should be addressed:

E-mail: [Yangrh@pku.edu.cn](mailto:Yangrh@pku.edu.cn); Fax: +86-731-88822523.

## EXPERIMENTAL SECTION

**Chemicals.** All deoxyribonucleic acids (DNAs) were synthesized by SangonBiotech Company, Ltd., (Shanghai, China) and their detailed sequence information is shown in Table S1. The oligonucleotides were purified by high-performance liquid chromatography (HPLC) and dissolved in ultrapure water as stock solutions. Trypsin-EDTA, trypsin-agarose, decane (anhydrous,  $\geq 99\%$ ), and protein biomarkers of AD including alpha-1 antitrypsin (AAT), Tau protein (the Tau 381 isoform) and the purified human BACE1 extracellular domain was purchased from Sigma-Aldrich Co., Ltd. (St. Louis, MO). Immunoglobulin G (IgG), Human serum albumin (HSA), Glucose Oxidase (GOx), lysozyme, thrombin, and insulin were commercially obtained from Dingguo Biotechnology CO., Ltd (Beijing, China). Proaerolysin was kindly provided by Prof. Yi-Tao Long from East China University of Science and Technology.<sup>1</sup> 1,2-Diphytanoyl-sn-glycero-3-phosphocholine (powder,  $\geq 99\%$ ) was purchased from Avanti Polar Lipids, Inc. (Alabaster, AL). Other reagents and solvents were provided by Sinopharm Chemical Reagent Co., Ltd. (China), and used without further treatment. Ultrapure water (18.2 M $\Omega$  cm) from a Milli-Q system with a Pyrogard filter (Millipore, MA, USA) was used for preparation of solution.

**Construction of aerolysin nanopore.** The aerolysin nanopore was conducted according to previous reports.<sup>2-4</sup> Typically, monomeric aerolysin was obtained by trypsin-EDTA digestion of proaerolysin for 11 h at room temperature. The lipid bilayer membrane was formed spanning a 50  $\mu\text{m}$  orifice in a Delrin bilayer cup

(Warner Instruments, USA). The aerolysin was injected adjacent to the aperture in the *cis* chamber, and the pore number was determined by a well-defined jump in the current value. The compartments on each side of the bilayer contained 1.0 ml of a buffer solution (1.0 M KCl, 10 mM Tris and 1.0 mM EDTA). The potential is applied using Ag/AgCl electrodes, and the *cis* compartment is defined as a virtual ground.

**Nanopore Experiments and Data Analysis.** All of the nanopore measurements were carried out at room temperature. The current traces were measured and amplified by an amplifier (DFCA-001) developed by Prof. Yi-Tao Long's group equipped with a Digidata 1440A A/D converter (Molecular Devices, Forest City, CA). The signals were low-pass filtered at 5 kHz and acquired at the sampling rate of 100 kHz by running Clampex 10.4 software (Molecular Devices, Forest City, CA). The data analysis was performed using the software from Yi-Tao Long's group (<http://ytlong.ecust.edu.cn/9148/list.htm>) based on MATLAB (R2011b, MathWorks<sup>5</sup>,<sup>6</sup>). The statistical figures were constructed via and OriginLab 9.0 (Origin-Lab Corporation, Northampton, MA).

**Table S1.** Oligonucleotides used in this study.

| Type         | from 5' to 3'                                                                                  |
|--------------|------------------------------------------------------------------------------------------------|
| Tau apt1     | TCTTTTGCGGAGCGTGGCAGGTTTCT                                                                     |
| Tau apt2     | TTCTTTTGCGGAGCGTGGCAGGTTTCTT                                                                   |
| Tau apt3     | CTTCTTTTGCGGAGCGTGGCAGGTTTCTTC                                                                 |
| AAT apt1     | TCTTTTGGGGCACGTACGGGCATCATAACAACAGGCGTGCCCCCT<br>TTTCT                                         |
| AAT apt2     | TTCTTTTGGGGCACGTACGGGCATCATAACAACAGGCGTGCCCC<br>TTTTCTT                                        |
| AAT apt3     | CTTCTTTTGGGGCACGTACGGGCATCATAACAACAGGCGTGCCCC<br>CTTTCTTC                                      |
| BACE1 apt1   | TCTTTTGCAATGGTACGGTACTTCCTGTGTTATTGTTATGTTTTT<br>CAGTGTAGTCAAAAGTGCACGCTACTTTGCTAATCTTTT       |
| BACE1 apt2   | TTCTTTTGCAATGGTACGGTACTTCCTGTGTTATTGTTATGTTTTT<br>TCAGTGTAGTCAAAAGTGCACGCTACTTTGCTAATCTTTTT    |
| BACE1 apt3   | CTTCTTTTGCAATGGTACGGTACTTCCTGTGTTATTGTTATGTTTTT<br>TTCAGTGTAGTCAAAAGTGCACGCTACTTTGCTAATCTTTTTT |
| Stem 1       | AAAAGA                                                                                         |
| Stem 2 (D7)  | AAAAGAA                                                                                        |
| Stem 3       | AAAAGAAG                                                                                       |
| Stem 4 (D10) | AAAAAAAGAA                                                                                     |
| Stem 5 (D13) | AAAAAAAAAAGAA                                                                                  |
| Stem 6       | AAAAGAAAAAAAA                                                                                  |

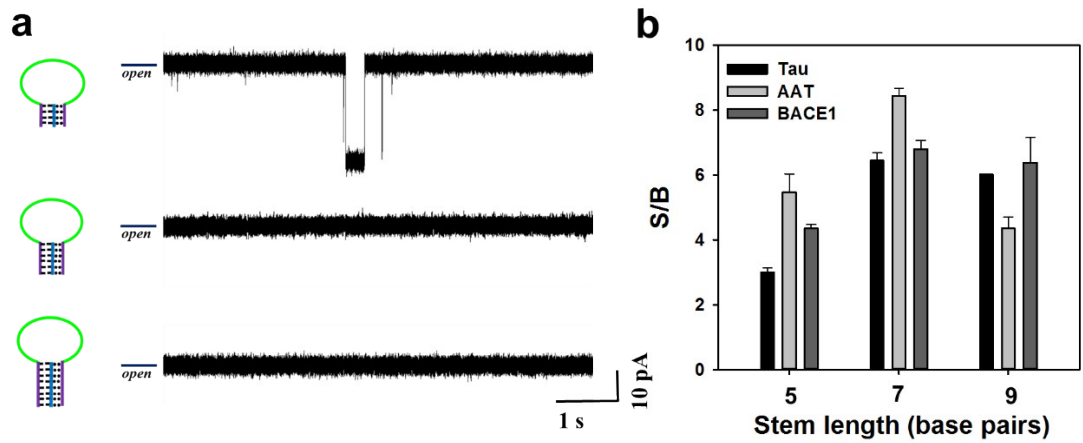

**Figure S1.** Determination of the stem length of TMS. The concentrations of three biomarkers are 10 nM. The channel recording time is 100 min/run. Each experiment was repeated three times.

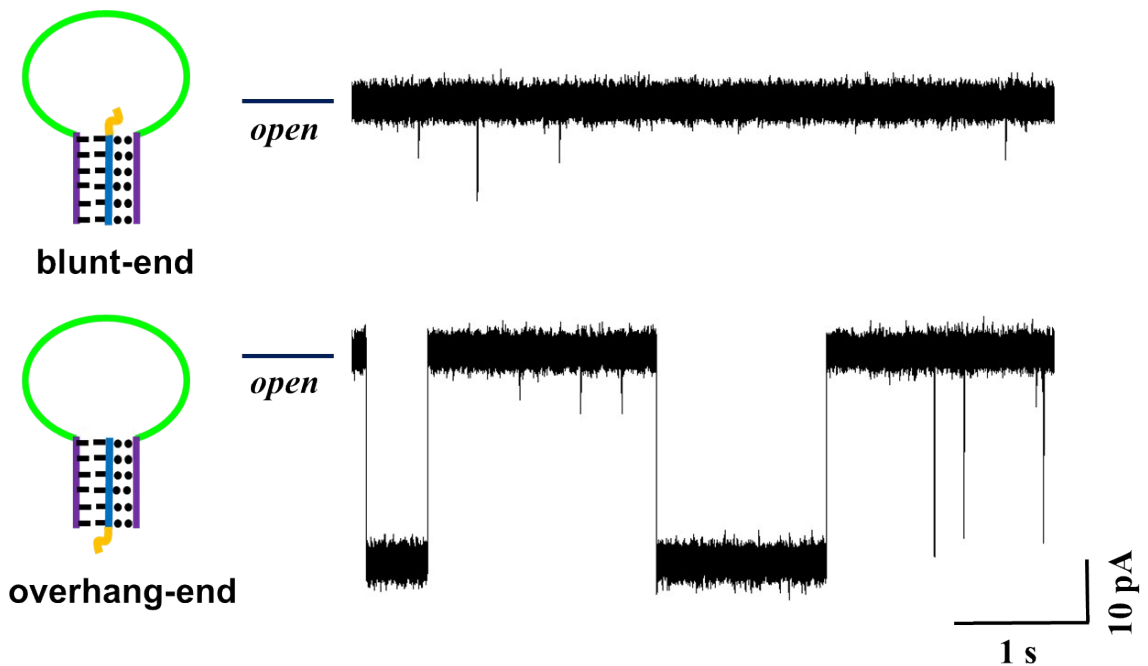

**Figure S2.** Comparison of the stability of overhang and a blunt-ended TMS. From the signature current event, it was obvious that the blunt-ended TMS is much more stable.

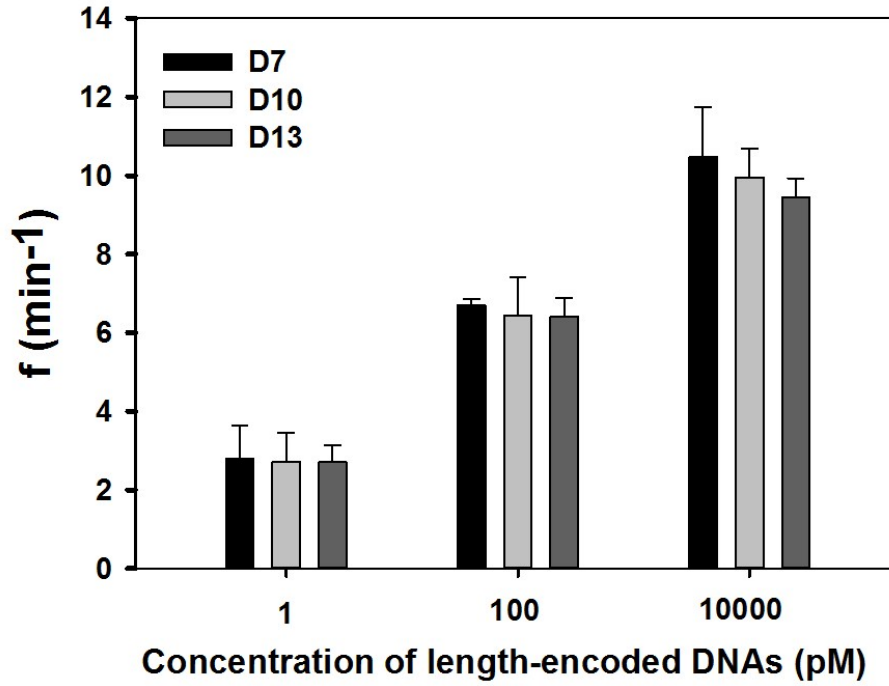

**Figure S3.** Signature frequencies at various concentrations of length-encoded DNAs.

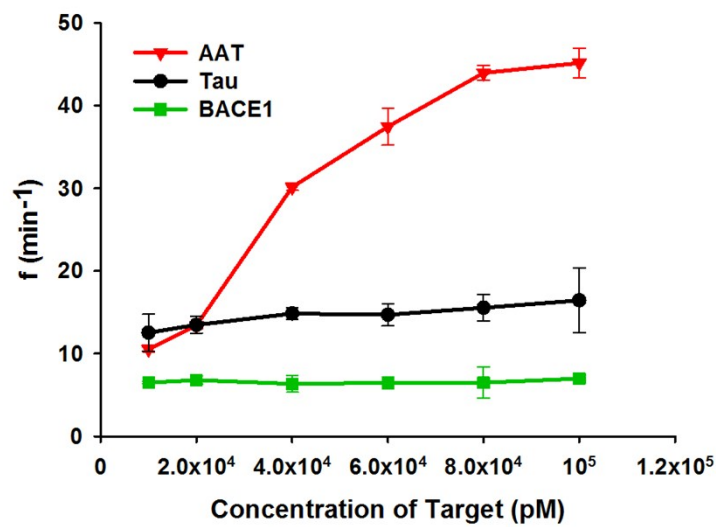

**Figure S4.** Signature frequencies at various AAT concentrations from 10 nM to 100 nM while concentrations of Tau and BACE1 proteins are fixed to 10 nM.

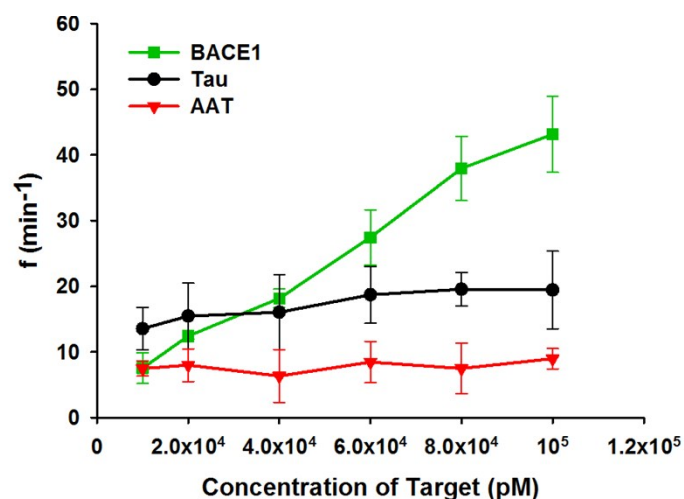

**Figure S5.** Simultaneous detection of multiple biomarkers. (a) current traces in presence of 10 nM Tau, AAT, and BACE. (b) Signature frequencies at various AAT concentrations from 10 nM to 100 nM while concentrations of Tau and BACE1 proteins are fixed to 10 nM.

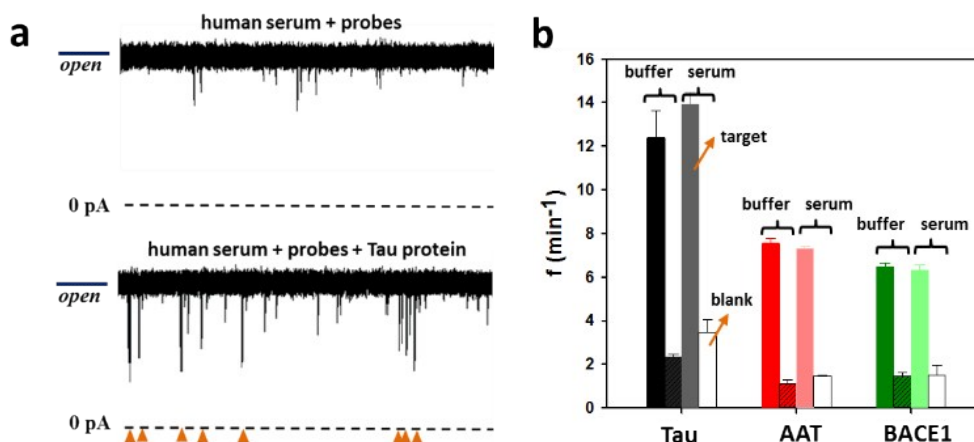

**Figure S6.** (a) Representative current traces for human serum sample in the absence and in the presence of Tau protein. (b) Comparison of multiple biomarker detection capability with and without human serum. The concentrations of the three biomarkers are 10 nM. The channel recording time is 100 min per run. Each experiment was repeated three times.

## REFERENCES

- [1] Y. Q. Wang, M. Y. Li, H. Qiu, C. Cao, M. B. Wang, X. Y. Wu, J. Huang, Y. L. Ying, Y. T. Long, *Anal. Chem.*, 2018, **90**, 7790.
- [2] C. Cao, Y. L. Ying, Z. L. Hu, D. F. Liao, H. Tian, Y. T. Long, *Nat. Nanotech.*, 2016, **11**, 713.
- [3] C. Cao, M. Y. Li, N. Cirauqui, Y. Q. Wang, M. D. Peraro, H. Tian, Y. T. Long, *Nat. Commun.*, 2018, **9**, 2823.
- [4] C. Cao, D. F. Liao, J. Yu, H. Tian, Y. T. Long, *Nat. Protoc.*, 2017, **12**, 1901.
- [5] Z. Gu, Y. L. Ying, C. Cao, P. He, Y. T. Long, *Anal. Chem.*, 2015, **87**, 907.
- [6] Z. L. Hu, Z. Y. Li, Y. L. Ying, J. Zhang, C. Cao, Y. T. Long, H. Tian, *Anal. Chem.*, 2018, **90**, 4268.
